# Supplementary material
Source: publisher figshare collection journal article supplement (https://karger.figshare.com/ndownloader/files/5958744)
Supplement: Supplementary file 1 [file 5958744]

## Sheet: Supplementary table 1
Supplementary table 1
Gene Set for GSEA (HIF1A binding)
AACS
ABCA1
ABL1
ACTR3
ACTR3BP2
ACTR3C
ADM
ADNP
AGPAT4
AIFM1
AK2
AK4
ALCAM
ALDH8A1
ALDOA
ALG10
ALG10B
ALKBH5
ANKMY2
ANKRD13A
ANKRD26P1
ANKRD30BL
ANKRD37
ANO6
ANXA4
AOX2P
ARHGAP1
ARHGEF16
ARID1A
ARID3A
ARL6IP6
ARMC1
ASAP2
ASB9P1
ASH1L
ASPH
ASXL1
ATF7IP
ATG16L2
ATG9A
ATP8A1
ATR
ATRN
ATXN7L2
AURKAIP1
AZIN1
B3GNT4
BAI3
BARX1
BAZ2A
BCKDK
BCL2L1
BCL6
BDH1
BHLHE40
BIRC7
BMP2
BNIP3L
BRWD3
BTBD16
C10orf10
C10orf129
C10orf28
C11orf2
C11orf68
C15orf23
C16orf58
C16orf61
C1orf106
C1orf31
C1orf51
C20orf112
C20orf132
C20orf166
C2orf57
C3orf21
C3orf58
C4orf3
C6orf203
C6orf223
C7orf30
C7orf42
C7orf68
C8orf58
C9orf106
C9orf30
C9orf5
CACNA1E
CAPS2
CARTPT
CASC4
CASZ1
CBX5
CCBL1
CCDC163P
CCDC19
CCDC34
CCNG2
CCRN4L
CD164
CD300E
CDC27
CDC45
CDCA3
CDCA7L
CDK12
CDK18
CEBPD
CELSR2
CENPC1
CENPF
CEP250
CEP63
CIZ1
CKB
CLN3
CLPB
CMTM3
COL27A1
COL5A1
COMTD1
COPS4
COQ4
CP
CPNE5
CPOX
CREB1
CTDP1
CTDSP1
CTHRC1
CWH43
CXXC5
CYR61
CYTH4
DAB2IP
DAP3
DAPK1
DARS
DDIT4
DDX20
DDX50
DDX54
DENND1A
DENND2A
DENND3
DGAT2
DGCR6
DISP1
DLG1
DLG2
DNAH5
DNAJB12
DPAGT1
DPCD
DSTYK
DYNLL1
E2F6
EFHD2
EFNA1
EFNA3
EGLN3
EIF3B
EIF3E
ELL
ELP2
EMB
EMBP1
ENO1-AS1
ENO2
EPAS1
EPHA3
ESR1
ETS1
EWSR1
FAIM
FAM129B
FAM160B1
FAM162A
FAM168A
FAM184A
FAM36A
FAM53C
FAM84B
FEM1C
FKBP15
FKBP1A-SDCBP2
FLCN
FLJ32224
FNDC3B
FNTB
FOSL2
FOXD1
FRG1B
FTSJ1
FUK
FUS
FUT11
GALNT4
GALNT9
GAPDH
GBA
GBE1
GCDH
GCFC1
GLI1
GOLGA1
GOLGA7B
GPI
GPN3
GPRIN2
GSDMC
GSN
GTF2E1
GUSBP4
GYG2P1
HEXIM1
HFM1
HIST1H2BC
HIST4H4
HMGA2
HMGCL
HYAL2
ICAM1
ID1
IFT52
IFT81
IGFBP3
IL1RAP
ING4
INO80C
INSIG2
INSR
INTS1
INTS10
IPO13
IQCG
ITGB1
ITPRIP
JUN
JUNB
KAZN
KCMF1
KCNIP1
KCNMA1
KCNN1
KCTD11
KDM3A
KDM4B
KDM4C
KDM5C
KDSR
KIAA1310
KIAA2013
KISS1R
KLHL31
KRCC1
KRT8
LAMA5
LCOR
LDHA
LDHD
LFNG
LGALS3BP
LGALS8
LIMD1
LOC100101266
LOC100129316
LOC100129716
LOC100130581
LOC100133920
LOC100216545
LOC100498859
LOC100499467
LOC120824
LOC148189
LOC154822
LOC283335
LOC284751
LOC285033
LOC407835
LOC440117
LOC440356
LOC441666
LOC550112
LOC554223
LOC643955
LOC728724
LPHN1
LPIN3
LPO
LRP5
LRPPRC
LRRC43
LRRTM3
LSAMP
LSG1
LUZP1
LY6K
LYL1
MACC1
MAF
MAGOHB
MALL
MCM4
MDGA1
MED22
MEMO1
MET
MGAT5B
MGEA5
MIB2
MIR1204
MIR1208
MIR1265
MIR153-1
MIR181B2
MIR29B2
MIR30D
MIR3193
MIR365-1
MIR3668
MIR3687
MIR3922
MIR424
MIR583
MIR599
MIR663
MIR663B
MIR708
MKKS
MLF1IP
MLL2
MNT
MOBKL2A
MRPL13
MRPL33
MRPL37
MRPS18A
MRPS23
MTERFD1
MTFP1
MTSS1L
MUC1
MXRA7
MYL12B
MYL4
MYLK
MYOF
NAMPT
NARF
NAT10
NAV1
NCKAP5
NCRNA00273
NCRNA00293
NCRNA00313
NDRG1
NDUFA4
NEDD9
NEK6
NFATC4
NFIL3
NFKB2
NFS1
NOL3
NOL8
NR6A1
NUAK2
NUP85
NVL
ODZ2
OR11H12
OR4C46
OR4F29
P4HA1
P4HB
PABPC1
PAFAH2
PAPD7
PCBD2
PCDH9
PCNXL3
PDCL
PDE10A
PDE8A
PEX13
PFKFB3
PFKFB4
PFKP
PGK1
PHACTR4
PHPT1
PIK3R3
PKIA
PKM2
PLAGL1
PLB1
PLCB2
PLCG2
PLEKHA8
PLIN2
PLOD2
PLOD3
PLXND1
PMEPA1
PMVK
PNRC1
POC1A
POLE3
POLR2L
POTEA
POU2F1
PPME1
PPP1R13L
PPP1R14B
PPP1R3C
PPP1R3E
PPP2R5B
PPP6R1
PRKAG2
PRKCI
PRPSAP1
PRSS8
PSMA1
PSORS1C3
PTCH1
PTGS1
PTP4A2
PTPN18
PTPRB
PTPRH
PVRL3
QSOX1
RAG2
RAPGEF6
RARA
RAVER1
RBBP5
RBCK1
RBL1
RBM39
RBPJ
REXO4
RFPL4B
RFX2
RGS3
RHBDF2
RIN1
RIN2
RIOK3
RIT1
RLF
RNF187
RNMT
ROBO1
ROCK1
ROCK1P1
RPH3AL
RPL22
RPN1
RPS12
RPUSD4
RRM2
RSBN1
RTP4
RWDD1
SATB2
SCAF11
SCD
SEC24A
SEC61B
SEC61G
SEMA3C
SEMA4B
SEMA4D
SEMA4F
SERPINE1
SERTAD2
SETD1A
SGSM2
SH3D21
SH3GL1
SIDT2
SIPA1L2
SIPA1L3
SLC16A3
SLC25A36
SLC28A1
SLC28A3
SLC2A1
SLC35B1
SLC43A3
SLC44A3
SLC45A1
SLC6A19
SLC7A5
SLC8A3
SLCO1C1
SLCO5A1
SMARCA2
SMARCD2
SMC2
SMEK2
SMS
SMYD3
SNAI1
SNAPC3
SNORA14B
SNORD105
SNORD2
SNRPB2
SNX15
SNX16
SNX33
SOX12
SPAG4
SPICE1
SPIN4
SPRY3
SRSF4
SS18L1
SSR3
STK35
STRA13
STX16
STX6
SULF1
SUPV3L1
SUSD1
SYT7
SYTL2
TACC1
TARDBP
TBL1X
TBL1XR1
TFPT
TFRC
THOC6
TIGD5
TJP3
TLE1
TLR4
TM9SF4
TMEM106A
TMEM123
TMEM139
TMEM144
TMEM146
TMEM170B
TMEM18
TMEM183B
TMEM189
TMEM44
TMEM45A
TMEM48
TMEM52
TNFAIP3
TNFAIP6
TNFRSF6B
TNIP1
TOR1AIP1
TPRA1
TPTE
TRAM2
TRAPPC9
TRIB1
TRIM48
TRMU
TRNAU1AP
TSC22D2
TSNARE1
TSPAN2
TTC30A
UBC
UBE2Q1
UBE3B
UCA1
UMPS
UNC45B
UNK
UPP1
UPRT
UQCRH
USP3
USP36
UTP18
VGLL4
VKORC1
VMAC
VTI1A
WASF2
WDR43
WDR45L
WDR60
WDR92
WFDC3
WFIKKN1
WNK3
WWOX
WWP1
XPO6
YWHAG
ZC3H10
ZC3HAV1L
ZCCHC3
ZCCHC6
ZDHHC7
ZFAND2A
ZFAND3
ZHX2
ZNF219
ZNF292
ZNF335
ZNF337
ZNF395
ZNF462
ZNF470
ZNF623
ZNF628
ZNF667
ZNF668
ZNF687
ZNF716
ZNF726
ZXDA

## Sheet: Supplementary table 2
Supplementary table 2
Primers for ChIP-qPCR and qPCR
Target Gene or Target Region	Primer Name	Oligonucleotide Sequence
Near HPRT1 region (negative control)	HPRT1_ChIP_F	5'-TGTTTGGGCTATTTACTAGTTG-3'
	HPRT1_ChIP_R	5'-ATAAAATGACTTAAGCCCAGAG-3'
Near COL1A1 region	COL1A1_ChIP_F	5'-TCCTCCAGTCCCATGATGGC-3'
	COL1A1_ChIP_R	5'-GCGACTTGAGTCACCAGGTC-3'
ACTB (internal control)	ACTB_mRNA_F	5'-AGAAGGAGATCACTGCCCTGGCACC-3'
	ACTB_mRNA_R	5'-CCTGCTTGCTGATCCACATCTGCTG-3'
COL1A1	COL1A1_mRNA_F	5'-GCCTCAAGGTATTGCTGGAC-3'
	COL1A1_mRNA_R	5'-ACCTTGTTTGCCAGGTTCAC-3'
Near SERPINE1 region	SERPINE1_ChIP_F	5'-ACATGCAAGAAGCCTGCTCC-3'
	SERPINE1_ChIP_R	5'-CAGCATGCCCAGAGTCACTG-3'
SERPINE1	SERPINE1_mRNA_F	5'-TGGCTCAGACCAACAAGTTCAA-3'
	SERPINE1_mRNA_R	5'-GGCAGTTCCAGGATGTCGTAG-3'

## Sheet: Supplementary table 3
Supplementary table 3
Expression of 11643 genes for GSEA
Name	Normoxia (RPKM)	Hypoxia (RPKM)
GAPDH	1556.89	4297.89
TMSB10	1648.73	2397.87
ACTG1	2390.74	1248.26
ENO1	1096.73	2319.38
ACTB	2089.21	780.115
RPL11	969.491	1299.33
PGK1	441.223	1284.8
RPL8	1090.85	836.021
LGALS1	842.578	1027.28
RPS3	695.415	1006.43
FN1	832.405	990.013
NDRG1	13.5308	986.643
VIM	667.628	982.35
RPL35A	786.134	968.867
TGFBI	911.692	563.72
RPL30	604.317	854.071
PKM2	803.506	849.007
RPL12	608.793	832.387
RPS6	658.642	829.801
UBC	437.913	829.153
TMSB4X	608.419	802.172
CALR	771.673	460.657
RPLP1	763.564	159.26
HSP90AB1	756.206	413.168
LDHA	515.641	745.839
DDIT4	83.473	711.242
FTL	683.621	683.475
TUBA1B	676.065	406.062
TPT1	578.317	662.387
RPS4X	502.734	653.417
TUBB	651.552	497.668
MT2A	649.989	206.848
HSPA8	646.518	124.807
RPL5	527.885	645.335
CFL1	644.098	266.618
SPP1	184.359	629.401
ALDOA	445.063	616.183
GNB2L1	510.841	607.981
RPLP2	607.294	160.846
RPL35	594.349	410.617
RPL37A	404.117	593.35
RPL3	353.109	583.552
UBB	549.894	582.09
RPL27	502.795	579.426
TUBB4B	577.782	164.915
RPS18	380.047	570.258
PRDX1	564.154	252.09
FLNA	549.594	288.323
PSAP	356.812	548.032
RPS11	346.741	545.783
B2M	443.58	538.426
MYL6	530.578	375.792
TAGLN2	508.083	312.274
PFN1	507.93	240.372
EEF2	507.598	472.055
RPS5	451.37	502.887
RPL38	497.871	344.643
RPS8	415.232	486.103
LDHB	477.806	413.594
AP2M1	476.689	446.286
SLC2A1	84.5745	476.251
S100A10	466.433	382.409
NCL	462.712	169.663
TPM1	462.007	227.141
STAT1	279.754	456.585
S100A11	452.325	185.515
RPS16	452.27	413.746
RPS25	321.07	449.513
DCBLD2	446.149	291.258
PABPC1	357.19	441.234
S100A6	424.169	432.4
LOXL2	193.176	425.891
HNRNPA2B1	424.736	228.972
H2AFZ	415.6	151.19
HSP90B1	402.836	357.717
GLS	324.541	400.986
SERPINE1	231.036	398.3
RPL23	320.786	386.516
ATP5B	384.557	274.418
HSP90AA1	382.591	76.2677
RPS15A	232.972	378.488
EEF1A2	347.76	375.897
OAZ1	370.82	90.6469
RPS14	294.238	367.867
EDARADD	175.053	365.844
ENO2	34.3392	360.26
SNRPB	356.289	140.997
TUBA1C	353.205	227.42
IGFBP3	46.4996	352.234
ANXA2P2	294.536	352.232
RPL7A	240.757	352.107
RPS20	237.869	336.051
RHOA	333.599	277.608
CYR61	330.799	174.1
RPLP0	260.177	328.13
P4HB	326.176	325.197
RPS12	269.234	323.326
HSPA5	323.066	89.4799
CKS2	318.284	246.483
CD63	313.821	248.57
BHLHE40	57.9713	312.916
GSTP1	308.917	161.399
AHNAK	170.864	306.514
RPS19	257.694	306.063
JAG1	298.604	145.796
SPARC	250.704	297.541
FAM162A	59.0649	296.464
TXN	291.748	149.516
RAN	290.958	149.757
MMP1	235.201	290.389
SCD	152.786	289.66
TRAM1	160.398	288.832
EDF1	283.431	151.463
TMBIM6	259.77	281.384
YWHAE	281.313	207.202
RPL19	246.57	280.632
MYH9	279.181	202.025
PLK2	274.487	230.464
RPL18	273.972	204.664
CTSZ	273.484	179.514
DHCR24	271.329	220.402
LAPTM4B	219.938	270.611
EIF4G2	264.835	139.437
PSMA7	258.7	113.258
UCHL1	252.439	89.6836
P4HA1	88.5617	250.87
HMGB2	247.52	193.031
TPI1	175.732	244.986
GANAB	170.848	244.694
EIF3H	184.037	243.371
GNAS	189.887	242.026
HSPB1	241.765	80.6487
UGCG	172.262	241.738
HSPD1	240.029	100.091
RPL4	192.645	238.557
COL4A1	208.931	238.532
HDGF	237.607	209.382
BNIP3	61.9937	237.529
COX4I1	222.835	237.513
PARK7	236.345	128.476
PSMB1	235.99	122.022
COL4A2	233.879	218.741
CALM2	230.039	185.47
PSMD2	227.242	120.19
NPNT	117.463	227.061
EEF1G	138.92	225.929
APLP2	157.37	224.293
NDUFS5	223.563	155.827
EIF3E	173.845	223.367
DSTN	221.546	132.964
RPS21	185.839	220.319
RPL26	172.299	215.224
CLIC1	203.578	214.963
FAU	213.6	100.839
ITM2B	142.165	212.684
COX7C	192.554	211.372
MORF4L2	211.214	154.59
CCT6A	210.441	65.055
SHFM1	209.028	159.682
RPS13	186.806	208.915
PTGES3	208.608	89.231
PSMB4	208.584	147.336
APP	131.101	207.09
EPB41L2	173.068	205.692
RPS9	205.461	176.849
ZFP36L1	147.323	205.111
EIF4A2	88.9803	204.083
GNB1	187.401	203.835
PEA15	203.09	130.935
TIMP2	87.4253	202.696
RPL36	201.788	125.874
PFDN5	147.976	201.458
CCT3	201.278	73.7255
MRFAP1	200.351	76.4741
UQCRH	181.853	196.762
ARF1	196.673	153.276
HLA-A	196.658	161.176
ANXA5	195.878	186.981
ANXA2	183.175	195.621
DYNLT1	94.3035	194.893
ATP5E	194.425	145.075
GPI	73.6084	194.284
RPL24	161.158	194.081
ITGB1	188.138	193.89
COX7B	193.74	191.892
KPNA2	193.416	86.5573
DNAJA1	193.156	33.3652
BSG	193.001	109.431
NAP1L1	148.712	192.276
MSN	192.272	136.202
JAK1	155.676	192.104
HNRNPH1	190.524	104.237
SLC25A3	188.993	190.378
CYBA	189.883	43.623
EEF1A1	107.575	187.896
PTTG1IP	133.458	187.255
DEK	186.721	164.102
RPN1	186.553	126.607
YWHAB	186.144	74.9331
NDUFB9	183.842	119.026
XRCC6	183.68	104.391
STIP1	182.956	71.2402
CSDE1	177.853	181.701
NPM1	181.36	163.016
PLP2	178.831	145.764
ARL6IP1	177.094	178.468
GLO1	176.844	79.7076
BTF3	163.446	176.762
SOD1	176.201	64.7688
TXNRD1	175.753	102.563
PCBP2	117.897	175.423
CCT2	175.327	73.3887
H3F3B	173.74	94.1424
KDELC1	69.3634	173.222
SLC25A5	173.202	157.011
SERPINH1	171.364	112.998
ERGIC3	120.094	171.031
MT1E	169.591	140.434
RPL10A	133.172	169.4
PLIN2	17.1272	169.336
WSB1	40.5235	168.976
SEC61G	164.552	168.859
EZR	168.191	160.675
RPL31	96.7005	167.1
MRPL51	167.051	84.1786
CNN3	166.533	130.257
COTL1	166.26	80.0516
CCT7	165.704	83.0961
ID3	164.966	17.4101
CAV2	72.5953	164.643
ANP32B	162.832	164.585
DYNLRB1	135.973	164.098
TMED2	163.593	119.043
CANX	163	156.305
YWHAZ	162.862	117.762
HDAC1	162.111	114.643
TRIM28	161.912	65.3069
HNRNPD	161.45	64.3601
AKR1B1	160.009	121.079
NDUFA1	132.24	159.668
KPNB1	159.45	128.888
RHOC	158.069	142.841
ARPC3	157.796	147.716
MYBL2	157.699	68.2631
PSMB7	157.24	122.704
NPC2	120.733	157.081
DYNLL1	156.889	55.8308
CCNI	76.0728	156.685
RPN2	156.03	129.363
SURF4	155.997	84.7458
HILPDA	14.3749	155.676
ERH	153.669	61.3835
C17orf76-AS1	87.7505	153.549
EIF5A	153.266	35.8781
2012-09-02	153.002	126.521
PTMA	152.412	78.046
PSMA4	151.497	56.5968
ARPC2	151.298	142.457
ATP5A1	150.677	110.965
PPIB	150.398	105.978
SFPQ	148.527	35.6507
PRPS1	148.129	50.9327
NONO	138.221	148.03
CSE1L	147.601	61.2766
TKT	145.18	147.507
RPS24	117.427	147.352
MYL12B	146.898	128.399
CCT4	146.885	95.58
PCNA	146.519	35.1197
PLOD2	68.9494	146.434
CNBP	146.096	104.53
BRK1	87.9134	144.835
YWHAQ	144.496	80.6633
WWTR1	144.494	140.093
CD151	140.572	144.349
PTMS	144.202	92.8122
S100A2	144.064	122.378
CAP1	144.034	79.9168
RPL37	99.1614	143.48
PTBP1	143.321	55.5761
XRCC5	143.214	71.7765
ACTN4	143.079	86.7697
ERP29	142.256	128.84
HNRNPK	141.991	80.55
LAMB1	69.4664	141.883
HNRNPM	141.658	30.3846
PFKP	110.443	141.617
TCP1	141.339	43.4985
SEC61B	140.813	28.117
BNIP3L	38.89	140.197
ARPC1B	139.844	37.663
HNRNPF	139.56	93.5214
PDIA4	139.433	84.1263
PRDX6	139.232	92.606
NUCKS1	139.204	119.968
PCBP1	139.204	125.59
CTSD	91.414	138.219
SPINT2	110.562	138.205
FBL	137.701	127.576
GNG12	137.547	79.6908
EIF3I	137.543	117.151
ETS1	80.5922	137.435
DDX5	137.426	65.0424
PRDX4	137.063	76.7375
ERRFI1	21.1712	137.059
ARL4C	136.739	127.241
FUS	136.691	29.4976
OCIAD2	136.025	91.3741
KDELR2	135.882	110.603
WDR1	135.794	63.8393
CCNB1	135.328	71.1746
FAM129B	134.737	115.474
ARF4	134.226	79.0991
TUBA4A	133.475	67.8996
LAMP1	133.469	127.553
ACTR3	132.913	69.2574
NEAT1	105.903	132.783
PDIA6	132.521	127.438
YWHAG	132.419	102.418
TMED9	132.048	85.2732
HN1	131.827	62.4036
ACTN1	131.767	68.315
MAPRE1	131.484	55.6118
STRAP	131.271	66.0058
CKB	30.606	130.869
PEG10	130.269	61.4593
PRKCSH	110.879	129.473
ATP5J2	129.412	88.5043
MT1X	46.537	129.32
CALM3	129.01	97.2209
RPSA	103.768	128.963
TPX2	128.897	96.9445
HSP90AB3P	128.775	71.5905
SSR3	128.49	97.718
TPD52L2	128.074	55.603
ERO1L	37.5579	128.035
MCM7	127.747	72.7021
COX8A	127.671	45.2019
FDFT1	127.579	124.206
ACTR2	127.456	86.2569
AIF1L	75.3121	127.131
TALDO1	126.452	66.2705
SNRPD2	121.628	126.326
RAB7A	125.637	106.712
ILF2	125.557	71.9187
HNRNPH3	125.456	60.0249
EIF3B	125.289	79.8965
NUDC	125.054	25.7722
CDH6	124.912	98.6511
SNX3	124.779	110.825
QSOX1	70.4151	124.033
EIF6	123.995	53.5186
CNN2	123.74	111.127
ATP5O	99.8507	123.556
GHITM	123.278	84.1159
CDK4	122.995	71.6613
AXL	66.3667	122.891
MDK	122.609	106.29
MYL12A	122.601	119.472
TXNIP	30.9498	122.471
EIF1	105.805	122.238
RAD21	111.66	122.226
CLSTN1	83.4599	122.215
DDX21	122.042	50.7372
SNRPF	121.979	49.7153
HNRNPU	121.943	64.1419
H1F0	17.6943	121.867
SET	121.36	97.9209
KHDRBS1	100.217	121.357
CORO1C	121.201	95.0555
SMC4	121.066	94.5562
UCP2	120.761	86.1672
NOP56	120.654	29.1291
ZNFX1-AS1	70.9907	120.57
TNFRSF12A	120.406	47.6125
RBBP7	119.749	60.7391
HN1L	103.758	119.55
COX6B1	92.1189	118.919
SSRP1	118.198	103.832
HNRNPAB	118.098	28.8047
TK1	117.995	49.6358
RPL13A	59.2407	117.904
VCP	116.957	36.8946
HINT1	116.557	101.223
INHBA	116.413	55.4393
DDX17	78.4947	116.253
SEC61A1	116.242	58.9123
LMAN1	65.3326	116.174
NACA2	115.681	107.937
ANLN	102.141	115.052
SSR2	114.869	114.977
TPM4	114.935	77.7024
ID1	114.812	39.9352
SH3BGRL3	114.798	69.7388
CD164	114.584	93.7672
S100A16	114.012	89.3741
PRDX3	113.95	62.2108
DAD1	113.484	88.2471
ITGAV	110.004	113.248
STMN1	113.201	81.1361
CLIC4	106.701	112.877
GALNT7	112.747	99.967
TOMM6	112.592	65.7559
KRT8	112.474	39.2693
TMEM123	88.7678	111.96
CTNNA1	98.637	111.855
CCT5	111.838	42.2622
TUBB6	111.535	40.3699
HDLBP	111.269	111.003
MATN2	62.7751	111.192
PGM1	49.6009	111.165
LITAF	78.6859	111.109
EIF3D	87.6253	110.612
PLCB4	83.0386	110.217
TMEM9	109.636	98.8226
PHB2	109.617	93.9577
ITGB3	82.8264	109.216
PRDX5	109.066	80.8212
VKORC1	63.6861	108.843
HNRNPL	108.719	77.4064
ARHGDIA	108.33	20.2289
EIF4G1	108.116	36.0361
NDUFB5	73.8401	108.112
PNISR	50.8772	107.869
NDUFB8	107.194	86.5784
SNHG6	107.182	89.0265
PSMC5	106.763	57.8944
MYC	106.578	60.0268
RPL14	89.2512	106.491
UBA1	106.431	75.6091
NDUFA8	106.346	77.1459
SLC16A3	106.304	45.9734
CDC20	105.985	72.376
YBX1	105.9	81.2502
COPB2	105.881	76.8173
APEX1	105.139	84.4338
GNAI2	105	85.7418
GAS5	43.4994	104.626
PLEKHA2	38.0394	104.596
ARF3	104.347	67.0406
PICALM	93.3798	104.227
COPZ1	100.565	104.166
ATP5G2	70.4481	104.101
PFKFB3	47.8367	104.076
SRSF1	103.433	33.086
RPL6	103.105	98.9365
2012-09-15	103.065	97.0277
ELOVL5	102.759	67.629
AHCY	102.757	87.1397
ARPC5	102.428	42.2242
ZYX	102.207	40.1486
HNRNPR	101.789	55.7669
ADRM1	101.767	32.7366
PEBP1	101.315	69.3928
SPTAN1	86.7155	101.305
DDOST	101.247	87.7743
CAV1	90.2749	101.204
EBP	101.047	76.2938
LASP1	100.816	75.345
FTH1	77.7533	100.747
SRP14	100.541	72.7865
KRT7	100.409	54.4813
CBX3	100.342	77.8113
HK1	47.1295	100.29
YWHAH	100.278	63.4967
CAPZB	100.152	70.1562
CYC1	100.125	90.9118
ATP5H	85.128	100.022
BCL2L1	69.609	99.5386
ROMO1	99.4606	28.6454
MLF2	99.1756	46.9033
AGRN	98.7908	71.4985
NACA	95.8791	98.7231
PSMC3	98.6795	39.7813
F3	18.2066	98.5275
SLC39A7	98.4953	66.142
PPP1CA	97.7996	50.0936
MDH2	97.7903	67.1746
HLA-B	77.7393	97.7675
PABPC3	69.7566	97.7138
STT3A	97.3195	94.1785
SF3B14	97.3167	75.4537
COX7A2L	71.8477	97.2501
LRRC59	97.1803	23.0908
VCL	96.8989	83.8406
ACLY	96.7915	80.6718
CAPN2	95.7946	96.5351
ODC1	96.3233	32.3787
RTN4	96.3068	83.5503
PSMA6	96.2994	75.4171
EIF3L	64.7287	96.0954
ACADVL	58.317	96.0447
U2AF2	96.0213	36.0345
LAPTM4A	95.8689	89.7645
QPRT	95.8615	79.8831
GDI2	95.8437	85.7783
ATF4	95.762	57.1139
TAF15	95.7006	37.6175
SDC2	95.6921	80.8158
DEFB1	21.7537	95.6721
EIF2S3	71.7833	95.5647
CCT8	95.508	68.3014
TOP2A	88.9037	95.0313
LAMC1	69.6912	94.9826
MYOF	34.6462	94.9717
HSPH1	94.72	15.2001
XPO1	94.6085	75.8304
FDPS	94.5255	82.3978
ALYREF	94.3843	24.2218
PTRF	94.2286	39.9992
LGMN	51.8735	94.1526
MGEA5	58.9001	94.0803
RAC1	94.0672	87.7895
H2AFY	94.0351	63.4944
PLS3	93.6844	63.3409
ATP6V0E1	93.5524	49.9317
DDX3X	93.5412	41.5028
PCNP	84.9214	93.4941
CITED2	93.4775	80.5256
EIF3A	93.4678	51.6703
ARF5	93.2801	66.5903
OS9	61.3184	93.2755
HP1BP3	60.4603	93.124
IRAK1	92.6515	47.6879
PRKDC	92.5587	58.2697
COX7A2	92.183	84.5941
ACTL6A	92.1487	34.5075
PRMT1	91.9836	34.2804
TMEM14C	91.5756	81.2512
MCM4	91.5048	43.9797
TSR2	91.496	58.279
CD81	91.361	89.1125
ALCAM	72.3195	91.3587
ZWINT	91.3422	33.6453
CDH2	91.2095	90.1309
MTCH1	83.1641	91.1299
SRSF11	76.2301	91.094
POLD2	90.9731	57.4954
CLTC	90.8581	80.1512
ERGIC1	56.5019	90.7747
UQCRBP1	68.386	90.6069
RAD23B	90.503	67.6691
PSMA1	90.4952	54.9111
PSMA2	90.4457	54.6246
SMS	86.9704	90.382
SRSF2	90.3744	45.9635
TFPI2	90.1515	70.2684
MAGED1	90.1117	62.7775
SRSF3	90.0986	47.4284
SPTBN1	64.1001	90.0977
UQCRC1	71.9691	90.0119
PRSS23	63.2932	89.989
PARP1	89.8285	40.1357
LGALS3BP	89.4039	61.4807
MARCKSL1	88.9369	37.4427
GPX4	88.8412	72.203
GFRA1	62.0007	88.7074
PFDN2	88.4526	27.509
TM4SF1	46.3903	88.2716
RBP7	75.8892	88.2293
THBS1	88.213	57.3121
SPCS3	86.5897	88.1995
TOMM20	55.5817	88.1555
ATP6V1F	58.7985	87.9181
CDC37	87.7603	31.496
TGFB1	36.3811	87.6629
SLC2A3	5.98242	87.635
CHD4	87.6051	80.809
PFN2	84.7095	87.4208
IARS	87.4126	44.5551
PPP2R1A	87.3441	62.9292
CALU	87.2909	72.8565
VEGFA	12.5243	87.1215
ECHS1	87.0311	53.1551
VAT1	46.0696	87.0222
SERINC3	50.9784	86.9939
EIF3M	86.9188	82.9334
SRSF9	86.8836	57.9586
DARS	48.7218	86.8668
PLAU	29.048	86.827
PPP1R3C	14.5022	86.6519
ACAT2	86.5474	35.896
UQCRC2	52.4656	86.2768
SQSTM1	86.2677	71.4354
SDC4	86.2428	73.8601
NOLC1	85.9849	28.9333
VLDLR	30.5604	85.8605
PDIA3	85.8284	75.8276
HMGN2	85.5953	19.9736
HAVCR1	44.7982	85.4499
GPR126	51.7718	85.3775
ABCA1	65.6812	85.316
ALPK2	69.9504	85.2019
MYL9	85.0568	45.4944
ANO6	33.0267	85.044
C20orf3	85.005	75.462
SND1	73.7417	84.9914
PPP1CC	84.9672	80.3029
TARS	84.8702	31.0176
ARRDC3	11.5449	84.8564
ANP32E	84.8056	55.9223
AHSA1	84.7962	14.6525
SCRN1	48.2381	84.6798
UBE2H	44.4358	84.6736
C12orf75	84.6175	83.9553
C11orf10	67.0296	84.6148
SEMA3C	58.1398	84.436
C6orf115	84.3217	50.6767
PXN	74.8456	84.0915
SF3B1	84.0855	81.4172
C1orf144	84.0345	48.0872
DSG2	46.2427	83.955
SHMT2	83.8321	57.1015
PTPRF	66.3983	83.7968
MLEC	83.6673	83.7377
NEK6	22.2243	83.5244
PPM1G	83.4911	52.325
MIR5047	83.4532	68.9123
MCM2	83.4259	43.2528
GRN	82.4899	83.2524
SLC25A36	30.1867	83.1529
KDELR1	75.4079	83.0641
RBM3	83.0238	46.5596
IMPDH2	71.4858	82.8316
ATP5C1	81.8947	82.6758
F11R	52.9187	82.6523
DNM2	48.6902	82.6198
NDUFA13	78.65	82.5552
OST4	82.5533	82.1463
FKBP10	55.8039	82.4931
HSBP1	82.3489	54.121
ALDH18A1	55.4987	82.3473
HNRNPC	82.3211	78.4891
KARS	82.2062	61.1521
PPT1	82.1324	65.1413
DSP	82.0524	67.5667
HMGCS1	82.0294	34.8739
CADM1	68.4982	81.9948
ARL6IP4	81.9696	63.378
CD46	66.759	81.8735
PCBD1	81.8304	58.6881
DHX15	81.8227	50.5182
NUTF2	81.7405	34.7293
DKC1	81.652	26.9527
PUF60	81.5398	21.3737
MRPL33	81.4792	65.2183
CIB1	67.5685	81.3609
SQLE	81.1224	47.376
UBL5	81.0741	67.7866
BICC1	46.9621	80.9065
DHX9	80.9056	18.6017
CTNNB1	80.8179	49.2674
NGFRAP1	80.7726	45.6603
UBQLN1	80.7569	71.9099
SFN	80.736	33.6122
RAB13	68.702	80.7005
SDF4	80.5791	49.8174
NDUFS6	80.5195	21.8751
MRPL37	80.2832	69.1403
ATP5I	79.1038	80.1745
ITGA3	65.6026	80.1338
GALNT2	80.0085	41.7563
LEPREL1	79.6061	70.6958
RPS29	51.4688	79.5874
GABARAP	58.2199	79.5025
AP2S1	79.3684	23.481
CAPZA1	79.3573	57.9514
HSPA9	79.3159	32.8842
EWSR1	79.2342	36.2651
CDV3	79.1206	44.0284
PSMD7	79.0936	31.4957
LMNB2	79.0772	24.5976
KHSRP	78.8814	33.4527
U2AF1	78.864	35.3832
DPM1	78.8092	39.5525
SF3B2	78.8003	75.6894
RBM39	78.753	60.5266
BUB3	78.7515	63.9305
RPL34	63.211	78.645
NFKBIZ	56.9323	78.5307
BANF1	78.5205	51.1389
MRPL3	78.3808	30.8167
NDUFB2	78.2501	40.0815
PTBP3	54.3759	78.1765
ARHGAP29	53.1876	78.146
WASF2	34.5736	78.1213
SLC39A1	74.3277	78.0638
PPIF	77.8461	37.7634
EPCAM	54.8181	77.7985
TUBB3	77.7045	33.3784
MRPL18	77.6419	28.2467
MAGED2	72.8916	77.6171
SEC11A	77.3767	77.5929
ARL6IP5	59.9701	77.4947
TBL1XR1	35.5194	77.4392
MAGOH	77.2461	31.1619
VBP1	77.2336	43.2351
FKBP1A	77.2286	56.577
PRRC2A	77.0505	50.294
SUMF2	52.2207	76.9784
RPL22	56.8271	76.7717
PGD	76.6495	72.5767
ATP5L	72.1321	76.271
CHCHD2	75.9383	32.0129
FLNC	75.9072	36.6086
MRPL20	75.8226	17.491
PSMD3	75.8093	30.4847
PSMB5	75.7754	43.0082
PABPC4	75.7327	61.2934
MRPL14	75.6728	40.79
COX6A1	75.6318	29.1384
MALAT1	50.5451	75.6009
TMEM50A	75.5885	38.6242
RPL32	52.9513	75.5702
PSMB6	75.5541	42.413
CRABP2	16.6959	75.3118
ANXA7	75.2937	53.561
FASN	75.287	16.4013
KTN1	58.0733	75.1757
SAE1	75.1484	45.6543
FLNB	52.1538	75.0814
RPL10	47.1423	75.0283
NUSAP1	75.0265	66.6645
PSMB3	74.983	40.1716
G3BP1	74.9453	29.3501
TCEAL4	54.1307	74.7568
TMEM141	43.2214	74.6018
PGRMC1	74.5558	49.0152
CSTB	74.514	61.4107
DRAP1	74.4479	56.5778
NBN	74.3182	59.2353
TSC22D2	31.2831	74.2028
ZNF207	74.1289	44.6634
EBNA1BP2	74.063	15.0306
SRP9	73.8846	58.7229
HNRNPUL1	73.8774	44.3347
RPL36AL	73.8719	67.4816
FUBP1	73.8649	50.7901
HNF1B	39.1337	73.745
CENPF	73.6977	57.3304
PPFIBP1	50.6201	73.5643
TRMT112	73.5027	39.1688
MCL1	73.4653	73.0179
CD24	49.8801	73.4555
IDH2	40.6081	73.3443
DAZAP2	73.3135	59.3926
WDR45L	56.0634	73.1862
TOMM5	73.1561	19.6918
DNAJC8	73.1497	51.0583
OGFRL1	60.8396	73.0754
C20orf43	73.0506	70.791
TCEA3	18.1202	73.0169
OGT	47.0972	73.0092
CHMP4B	72.9646	42.5612
TH1L	72.9476	48.1139
MET	57.3614	72.8809
TNNT1	38.4059	72.8516
GNS	45.3915	72.7551
SRRM2	71.0938	72.641
NUDT21	72.6379	53.835
APRT	72.6259	16.7212
KRT18	72.5892	44.4555
NDUFA12	72.4789	56.7737
CPNE1	63.6791	72.3521
DBI	72.2317	47.8749
DAZAP1	72.2147	32.9406
EIF4H	72.1949	46.6054
KIAA0101	72.1942	65.1183
EEF1B2	72.1931	68.2626
ECH1	38.6275	72.0224
XRN2	71.9522	56.7609
KLF6	46.2127	71.846
AMIGO2	71.679	37.5363
TFRC	71.6517	10.8354
PDIA3P	71.6111	65.8758
RUVBL1	71.5952	27.1393
PTPLAD1	71.4282	42.9628
PPP1CB	51.2781	71.1909
PDCD5	71.1802	23.6677
MAZ	64.0846	71.117
NCAPD2	65.3939	71.0805
SDHB	71.0754	45.2651
LUC7L3	53.9974	71.0308
CXCL5	70.9707	27.8534
AMPD2	26.4759	70.9313
CENPW	70.9135	32.8681
FOSL1	24.8204	70.6571
PDLIM1	45.4165	70.6431
PLOD1	61.6998	70.5023
CTNNAL1	66.4362	70.4625
ATP5EP2	70.3264	55.6559
EXT1	56.0651	70.29
HSPA4	70.2833	26.7213
GNB2	70.1785	35.3653
BCAP31	70.1569	49.5365
GABARAPL1	44.1956	70.096
EEF1D	70.024	37.8643
C1orf43	69.9361	69.5929
SNRPD3	69.8266	31.8902
CLNS1A	69.6824	41.8337
SNRNP70	69.5855	22.8183
MAP4	65.8341	69.4343
ARCN1	69.4231	53.6466
FLOT1	50.5615	69.3239
TFG	69.2971	62.8764
CRYZ	69.2913	63.8122
SSBP1	69.2883	34.2306
IGFN1	69.2646	65.5863
PGRMC2	66.7413	69.2548
RRM1	69.2535	42.8803
CSDA	69.2261	51.6018
C6orf62	65.47	69.1742
CCDC124	69.0329	11.0096
TMEM106C	62.7126	69.0294
PPP2R4	69.018	63.7981
PRKAR1A	68.9273	67.5746
MCM3	68.8637	39.0685
HMGCR	68.7583	43.3846
BIRC5	68.6597	29.2269
PA2G4	68.6001	20.1639
MARCKS	52.6941	68.5265
PTPN14	65.9168	68.4749
BAG6	68.3735	54.5932
AURKA	68.3251	38.508
SDCBP	60.9358	68.3052
CMPK1	68.2659	47.8486
EIF3K	65.6076	68.2614
PAICS	68.1903	45.7876
RAB1B	68.1129	41.6761
CTSA	67.6582	68.0725
MSMO1	68.0504	65.5143
WBP5	67.7541	50.2122
GMPS	61.2409	67.7195
FUCA2	67.6809	55.5757
POLE3	67.6389	32.3503
VPS35	67.5288	58.0063
RPL29	67.5189	33.2052
C4orf3	21.9929	67.3308
PTDSS1	67.2459	46.8751
TMEM14B	67.2252	45.2754
ILF3	67.1912	39.1249
VMP1	67.1551	58.1776
PSMA3	67.1463	26.0143
CSNK2B	67.1293	60.4389
EGFR	29.8529	67.1092
COPA	56.0506	67.0631
ZNF664	66.7514	58.76
RANGAP1	66.7494	32.3387
NDUFB4	62.2026	66.5495
PLK1	66.5493	37.9928
ATP6AP2	57.8084	66.4344
ATIC	66.373	32.2214
ATP13A3	43.765	66.3396
PHB	66.2848	32.5613
NPEPPS	34.0717	66.1729
SUMO2	54.5665	66.1491
WDR34	66.0383	22.3555
KDM1A	66.0318	54.4692
ATP6AP1	52.4082	66.0133
FZD6	56.5199	65.987
PRNP	65.7871	47.9702
CAPNS1	65.7574	56.7962
CERS2	63.2777	65.6794
HPRT1	65.6617	35.5406
NARS	65.5626	41.6959
POLR2K	65.299	34.9241
SLC38A2	65.2765	41.2203
GPC4	41.262	65.1401
ECT2	65.1179	60.6051
DDB1	65.1164	54.4401
PSMD12	65.0164	19.5132
ARPC1A	64.8601	36.7195
FOSL2	64.8413	50.8692
PNN	64.7735	42.6297
VAMP3	64.7667	62.5346
SF1	64.7522	19.9654
HSD17B10	64.6262	28.1913
TAPBP	64.626	63.2953
SF3B5	64.4521	43.6641
TUFM	64.3997	48.8599
ARPC5L	64.3481	27.6744
TFAM	64.3419	24.8835
UBE2C	64.3003	33.754
EIF4B	35.483	64.2159
PAWR	54.014	64.1866
COPB1	64.1519	50.1095
SERINC1	49.0104	64.1455
ATP1A1	64.1169	52.8937
PAPSS2	64.103	60.8644
MCAM	64.0659	40.7098
ATP1B3	63.9627	35.1831
UBA6	56.4381	63.9106
MDH1	63.8809	59.1681
RALB	61.3298	63.7076
NCOA4	62.6956	63.6569
MOB1A	63.6168	34.6087
GRINA	63.0715	63.6159
CNIH4	61.0337	63.59
BASP1	63.5859	36.333
PPDPF	63.4797	21.2857
NCBP2	63.4685	50.6632
PRC1	63.4271	53.5611
SRM	63.4164	9.26569
SLC44A1	50.8985	63.4056
RALA	63.3913	49.8578
PCMT1	63.3436	45.5735
ZDHHC7	29.6122	63.2917
RPS23	55.7825	63.263
LMNA	63.2383	32.215
IL32	63.118	42.396
C14orf166	63.0848	54.01
ATP6V1G1	62.9247	48.1281
EIF3G	62.8821	48.9174
STOML2	62.752	40.3602
DERA	43.7107	62.7287
GALNT14	33.917	62.7162
RAB5C	62.6453	33.7093
CCNC	62.6433	46.9599
CDK1	62.6306	38.9399
NASP	62.6256	35.3344
ASNA1	62.6199	38.2874
CLTA	62.5674	47.9746
UBA52	55.0288	62.5538
DCTN2	62.5485	61.1737
MRPL32	62.4792	34.855
ATP1B1	27.8003	62.4582
NFIL3	32.9682	62.4289
HNRPDL	62.1501	43.65
TMEM30A	62.063	47.5493
ERBB2IP	40.2675	62.017
C6orf48	61.9514	61.8966
YKT6	61.9513	39.8857
TWSG1	38.6196	61.9028
G3BP2	61.8706	40.4544
COPG	61.8665	51.8633
HYOU1	61.8644	41.5199
HBXIP	56.6264	61.8366
MYO1E	36.113	61.7586
SAR1A	61.7207	33.7013
NAA20	61.6557	31.5713
IDH3B	61.617	45.0581
PIGT	56.6054	61.5917
SSU72	61.3821	41.7196
CTHRC1	24.9082	61.3572
SNORD80	61.3369	41.081
MRPS15	61.2915	37.5991
TIMM17A	61.266	26.971
CNPY2	61.1556	27.6997
P4HA2	20.7662	61.1185
EMG1	61.0144	26.4805
CS	60.9641	48.1753
IARS2	50.9374	60.9616
IQGAP1	56.934	60.8504
ELOVL1	60.8409	37.5977
TARDBP	60.8341	33.8916
PRRC2C	60.7742	53.0047
ADAM10	47.0017	60.7581
C5orf15	60.6491	44.9799
PFDN1	60.6403	39.2664
PTTG1	57.9851	60.6382
TBCA	60.6337	46.6386
UBE2V2	60.5626	43.1149
PSMD1	60.5139	16.725
SYT13	16.9003	60.4669
HAT1	60.4029	26.1984
2012-09-09	48.1207	60.3947
PMPCA	60.3855	26.5202
MKI67	60.3177	42.8749
BRD2	60.28	50.8529
ARFGAP1	60.0339	20.2867
IGF2R	51.7929	59.9547
RCC2	59.8397	30.1967
PON2	59.7926	50.4232
HNRNPA0	59.7783	20.5363
RPL28	57.2097	59.7014
CKAP5	51.3191	59.4547
HKDC1	59.4001	48.2912
PSMD13	59.3974	32.5395
XPO6	59.3935	42.7363
CHRDL1	39.5317	59.3572
ESD	59.1151	59.3451
RHOBTB3	57.9331	59.3076
CAPG	59.1555	59.1543
DHCR7	59.1377	36.4421
COX5B	59.0735	27.419
SRRT	59.063	11.1699
PSMD11	59.0344	20.76
SSNA1	59.0015	26.2617
SLIRP	58.907	30.2761
FADS1	56.2562	58.8616
GNG5	58.8155	20.9175
OSGIN2	58.7682	55.7836
VPS29	58.6866	46.6082
HJURP	58.661	41.9306
CETN2	58.6375	45.1699
SERPINB6	44.9078	58.6268
HSPB11	58.6074	36.3721
PSMD14	58.5496	34.9678
PHPT1	58.4281	45.0166
PRPF19	58.3164	18.6424
TRIB3	39.9185	58.2875
NFE2L1	58.2861	50.9522
USP22	58.2486	38.825
SKAP2	34.89	58.2188
DCTPP1	58.0678	12.1627
SRSF5	58.042	52.5338
EFHD2	57.9426	32.2112
NAP1L4	57.8663	34.3944
TGOLN2	57.7899	55.6524
DNAJB11	57.7811	22.9243
HIATL1	57.7692	39.487
SDC1	57.753	18.2355
NAA50	57.751	20.8439
YARS	57.714	28.5457
COPS6	57.6751	43.7035
ANP32A	57.5773	44.751
ANKLE2	57.5626	44.807
FNDC3B	37.1887	57.5583
LMNB1	57.5201	39.2388
NRBP1	57.4929	36.6145
FKBP8	57.4888	41.9801
UBAP2L	57.4507	47.37
FAM50A	54.2052	57.3242
SNRNP200	57.3042	55.8284
LSM7	57.2957	24.1625
PSMD6	57.202	21.8093
ZC3H15	57.1132	39.5356
MICU1	34.8466	57.0444
PDZK1IP1	21.9744	57.0415
SLC16A1	57.032	26.566
CDK2AP2	57.0249	27.8422
PRRC2B	55.4653	56.9428
TMPO	56.9065	36.0811
MEA1	51.9049	56.8502
LINC00493	32.2864	56.808
NHP2	56.7902	13.2863
FSCN1	56.7855	25.6785
AKAP12	43.2086	56.6685
BZW2	56.5399	28.4243
STAU1	50.0607	56.5293
SNRPC	56.5135	27.2326
THRAP3	56.5019	44.429
MCM5	56.4538	26.2486
PDGFC	36.394	56.3865
NOP10	56.2272	31.6329
RBMX	56.2125	37.1911
MATR3	56.1958	30.3343
KRTCAP2	56.1511	44.5333
TSC22D3	11.7965	56.0201
APH1A	45.1847	55.9995
MAL2	38.3149	55.9863
PYCR1	55.9343	13.4834
MRPL12	55.7773	20.5261
CCBE1	55.0072	55.5794
CD44	55.5717	51.8941
PFDN6	55.5539	35.4377
FAM120A	55.5492	53.9269
PPA1	55.5206	34.6371
RRAGA	16.0686	55.499
PQBP1	55.3911	35.7401
EIF4A3	55.3855	23.7712
RNH1	55.3567	13.4361
C9orf5	39.125	55.355
C19orf10	55.3453	35.5289
DTYMK	55.3324	17.2589
AAMP	55.3177	33.1248
FMNL2	30.8228	55.2736
CXXC5	55.2603	19.0719
B4GALT5	55.2568	49.3836
CDCA8	55.1298	38.51
ADIPOR2	55.1105	41.5588
GPX1	55.1052	10.9189
ACTR1A	55.0165	36.5483
CIZ1	51.9008	54.941
ATP5F1	54.915	38.6275
PALLD	54.8973	40.6402
MCU	36.0078	54.8334
PHF17	42.4652	54.8314
ATN1	48.2677	54.8203
RPL23P8	46.5494	54.7891
RPL39	50.569	54.7526
DDX1	54.7394	26.9945
DYNLL2	54.6927	22.9125
GOT2	54.6688	28.293
SSR4	54.6457	23.5157
M6PR	54.6456	38.8599
COX6C	54.6377	48.6178
SNORD36A	54.623	26.7102
TOMM22	54.6185	27.729
C1QBP	54.6177	19.9534
SREBF2	40.1826	54.5767
CEP55	54.5442	40.216
NDUFB7	54.5322	13.0909
FKBP3	54.5061	28.3402
NANS	54.5061	31.5353
STAT6	54.5056	46.1441
PSMB2	54.4813	17.8884
MRPS7	54.4221	19.7976
MALT1	48.1467	54.4168
SSB	54.4165	25.0631
MMADHC	54.3765	46.662
GBE1	19.1351	54.3719
LOX	7.87783	54.2852
NOL7	54.2834	24.0208
MNF1	54.1796	34.7127
FAM168B	54.1436	47.2187
PRPF8	54.1378	37.7817
NCSTN	36.1534	54.1121
ANKZF1	21.2435	54.0646
MAD2L1	54.0537	29.1283
CACYBP	54.0238	16.8818
TMEM109	53.9709	20.5763
DDX47	53.9641	42.5658
NIPSNAP1	27.2154	53.8839
ADNP	43.8239	53.8761
SRP68	53.8696	45.3829
UACA	22.0325	53.8559
PSMD4	53.6046	44.117
RDX	48.6367	53.5679
CCNG1	32.1273	53.5589
CTSB	33.8244	53.474
RRM2	53.4701	27.0587
ETFA	53.4592	38.8225
SRRM1	30.5472	53.4313
PLIN3	53.4219	37.271
NDUFS8	53.3782	10.0861
TIMP1	43.7938	53.3621
DDX42	53.2395	37.7675
CCDC99	53.2164	26.7643
CSRP1	53.1458	45.058
DENR	53.1103	36.6386
FOXM1	53.0851	33.7651
PTPN12	29.5189	53.0121
PPME1	48.6538	52.9979
NUCB1	47.7496	52.9937
SPIN1	52.5399	52.9845
MANF	52.9774	17.3403
ATP6V0D1	52.9244	26.6782
PAX8	35.3225	52.9198
SRSF4	52.8981	51.9804
NCKAP1	51.333	52.8876
UBE2Z	52.8836	41.752
AHCYL1	39.3463	52.872
PSMC4	52.7545	18.874
GARS	52.7456	28.9741
SRSF6	52.7411	30.0879
NDUFV1	52.6843	32.7204
H3F3C	52.6353	28.8076
HLA-C	52.6066	44.9661
REXO2	52.5759	15.3906
NPLOC4	52.5224	25.2262
GUK1	52.518	24.515
CDK2AP1	52.4872	32.092
WBP2	47.636	52.4806
NME2	52.4339	1.10792
STARD7	52.4271	27.0628
TRA2B	52.4178	14.7031
ATPIF1	52.4015	19.581
QARS	39.0325	52.3784
PTP4A2	43.3107	52.3653
SNRPB2	52.3612	24.7685
PRDX2	44.9398	52.2713
SLBP	52.2601	33.2972
SRSF7	52.251	22.2782
DBN1	52.2255	14.3539
HADHA	46.9541	52.2102
PPP2CA	52.1753	25.3701
AURKB	52.0904	34.1009
CAND1	52.0207	39.7398
ANXA3	52.0167	35.9746
ADD3	29.4485	51.9983
ECI2	36.9911	51.9805
CBX1	51.9692	41.0834
RNF181	38.9856	51.8835
ACP1	51.8557	42.2878
EPS8L2	51.8309	41.5322
KITLG	51.8194	34.9554
PAIP2	51.8044	47.2359
SPCS1	51.8021	27.3213
NHP2L1	51.7884	39.7773
TSN	51.7822	19.1072
ANXA11	51.7213	50.9431
TRIM44	43.4254	51.6221
EIF3F	32.417	51.5845
DEGS1	51.5652	18.0071
NEU1	31.0604	51.5529
VPS26A	51.4882	41.7593
FAM83D	51.4724	32.6724
SEC22B	51.3171	27.4759
IDI1	51.2938	29.2012
DYNC1LI2	51.2933	35.8001
GNG11	51.2797	44.8194
TGM2	51.1904	40.0163
RUVBL2	51.1849	23.4576
SMG5	51.1675	28.7367
KIF2C	51.1391	45.2849
PTK2	36.4467	51.1257
EPRS	51.1081	38.8973
VDAC1	49.952	51.0462
TRAPPC3	51.002	23.1376
NRAS	50.994	37.1112
RCN1	50.943	36.9314
TM9SF4	34.2845	50.9226
TMEM54	50.8306	45.3509
ADM	0.887075	50.8102
MARS	50.8081	16.5484
EMD	50.8057	35.2599
AP1S1	50.7646	36.2287
MAP7D1	50.732	15.4283
SNX12	50.7302	44.1693
EID1	50.6636	27.5763
ZMAT2	50.6515	34.9353
ADAR	50.6343	38.8676
CENPB	50.6029	13.9382
NOP58	50.5928	13.1471
CRIP2	50.5546	18.1257
URM1	50.5403	49.3597
OPTN	21.7554	50.5244
UQCRHL	47.3554	50.4614
CCNB2	50.4573	46.4126
PSME1	46.8138	50.407
KDM3A	22.8242	50.392
CKAP2	50.37	39.5849
RRBP1	50.3192	28.1471
AZIN1	43.4655	50.312
ANAPC5	50.3071	27.1247
POLR2H	46.3142	50.2451
GPR56	50.2282	33.7533
GLT25D1	50.2229	33.0514
YEATS2	25.2768	50.2165
CCDC14	29.855	50.2091
ZNF217	32.7382	50.2086
SLC35B2	50.181	48.2669
HSDL2	34.7633	50.1262
SMARCC1	41.7117	50.0743
RACGAP1	50.0665	39.5765
SNRPA	50.0285	41.0245
UBE2N	49.9989	21.2761
LGALS3	34.2691	49.9481
ABL1	37.3526	49.9247
TOMM34	49.8576	26.5772
ZRANB2	49.8496	36.0983
FAM49B	49.8487	32.0814
ABHD12	44.6316	49.8266
TRAPPC1	49.783	40.0561
OSTC	49.6669	42.4395
UNG	49.6563	15.7687
PDLIM7	49.6451	9.42713
POLR2A	49.6273	35.2965
SLC4A2	49.5698	16.7938
HIF1A	44.5285	49.5625
GLRX3	49.4365	36.2391
COPE	49.4166	18.5134
GDI1	39.3282	49.3767
RAD23A	49.3687	44.0651
NCAPG2	49.3375	36.0955
KIFC1	49.26	30.5231
EHD2	49.2517	38.0084
RAB11FIP1	25.3752	49.2208
LMAN2	49.2078	22.0097
DDX18	49.0954	28.349
TOP1	49.0948	27.8193
EIF4E2	49.0549	29.7333
CD70	49.0228	16.7458
HMGN1	49.0062	36.6241
DDX23	48.9687	24.2526
UBE2D3	48.9423	42.1701
FAM136A	48.9225	27.6887
POLR2E	48.9189	16.6971
NNMT	48.8735	13.1621
MXRA7	24.3206	48.8682
CD2AP	48.8643	43.9511
CNOT1	48.8295	46.1722
UCA1	32.0966	48.8156
PSME2	48.7832	25.9047
HUWE1	48.6348	47.9565
MAT2A	48.5743	21.848
AMOTL2	48.566	42.612
ATP2A2	48.5385	36.1658
MAPKAP1	48.5308	29.1779
LFNG	48.5302	27.0641
METAP1	42.788	48.5296
PYGB	48.5212	32.4635
FKBP4	48.5078	22.7304
RIC8A	48.4059	26.9339
POLE4	48.4027	15.934
CNIH	48.3998	40.0034
IVNS1ABP	44.2294	48.3648
LSM3	48.3619	30.6687
MRPL13	48.3246	22.5521
SIVA1	48.198	1.99547
PFKFB4	6.65691	48.1243
STK25	48.1005	44.942
SEC13	48.07	31.5452
EPDR1	48.0494	32.2987
CD59	48.0281	36.6221
PARD3	28.7629	48.0235
DIAPH1	48.0047	39.7802
EFTUD2	47.9778	25.6833
C6orf106	38.5039	47.9478
TGFB1I1	47.8999	37.171
FSTL3	47.8967	43.6299
SNRNP40	47.8908	14.9406
ATP6V0B	47.8115	16.5279
PTPN13	44.6926	47.785
LACTB2	42.1865	47.7791
MAGT1	47.7636	40.5575
MANBAL	47.7063	40.6076
RCC1	47.705	29.5745
SLC25A39	47.6995	20.4059
NDUFB11	47.6885	30.4268
TNIP1	38.6715	47.6302
GGH	47.6273	29.5173
GNL3	47.5715	22.1773
TRIO	33.0681	47.5534
GNAI3	47.0774	47.543
TIMMDC1	47.4618	28.511
RASAL2	21.4924	47.3235
SYNCRIP	47.3033	27.7486
SYPL1	44.7727	47.2423
GMNN	47.2336	17.8803
GLG1	25.1567	47.226
EXOSC10	47.1586	36.1287
SF3B4	47.1386	14.6189
DAP3	47.1352	45.5266
KLHDC3	47.1182	36.8646
CHMP2A	43.3748	47.068
SERBP1	47.037	20.0445
SON	47.0017	29.1371
MRPL47	46.9374	23.6589
STT3B	46.9371	41.6382
RBX1	46.9241	38.8094
AP2B1	41.0591	46.8798
CAPRIN1	46.8502	42.5354
ATP6V0C	46.8162	12.6282
NPC1	17.0167	46.7734
MFN2	46.77	28.6873
DPCD	21.2736	46.7345
ASPH	22.697	46.7292
MRPS22	46.7134	22.2252
MMP14	46.6819	41.3472
TPGS2	44.4545	46.6737
AFAP1L2	46.6589	19.4522
RAB1A	46.6587	29.4691
DDX27	46.6554	26.0462
SEMA4B	18.7612	46.6148
MIR3064	46.5913	38.539
CUTA	46.5456	31.8651
CDCA3	46.5187	24.272
C3orf26	46.4478	17.7904
ITM2C	32.576	46.4472
IGBP1	19.1038	46.3985
CSNK2A1	43.6119	46.3831
MTHFD2	46.3706	32.3608
DKK3	46.364	46.2882
TMEM66	46.3362	41.8284
MRPS2	46.3236	21.0629
PWP1	46.2896	18.958
ESYT2	28.8591	46.2893
RAB14	45.6509	46.2748
SUPT16H	46.2291	30.1431
MAF1	46.2269	40.5032
EIF5B	46.1689	24.1722
NID1	35.3681	46.1626
LARP1	46.1584	34.7755
RNPEP	46.0098	46.1457
MT1F	32.54	46.0796
SGTA	46.068	12.7378
NME1	45.9613	12.1556
CTPS	45.9376	10.801
CHMP1A	45.9323	20.9279
POMP	45.9066	23.4523
WBP11	45.881	33.6225
WBSCR22	45.8702	21.6558
GTF3C6	45.8614	10.5941
CRIM1	44.2023	45.8534
TXNDC12	45.736	36.7829
GTPBP4	45.7246	19.1779
JUNB	45.7115	10.3076
PRSS8	9.2561	45.6992
PSME3	45.6442	10.9169
OAT	45.6415	31.899
DTD1	45.625	40.4698
SYTL3	8.64502	45.6213
CDR2	34.8476	45.5991
MTHFD1	45.5747	24.2065
PTPN1	45.5722	43.1584
PDK1	14.6275	45.5077
RBM25	45.5028	37.1994
HIPK2	36.638	45.5026
DCTD	45.5001	36.1647
SLC1A5	45.4723	12.1571
RARS	45.4671	23.522
MRPL27	45.4646	23.5719
S100A13	38.7798	45.3578
HM13	45.3209	42.6369
U2SURP	45.2705	31.6014
NRD1	45.2498	44.3565
MRPS28	45.2074	12.83
ILK	45.1895	33.0939
MORF4L1	45.1857	31.5736
MRPL24	45.1781	25.6902
CDK18	7.83442	45.0826
VDAC3	45.0217	34.0503
IPO7	45.0214	38.4296
PDXK	31.5386	45.0017
SURF6	44.9933	9.61429
HMGA1	44.98	23.0108
MYL6B	28.2361	44.9454
RPSAP58	34.8217	44.8824
ESYT1	42.8145	44.8672
DAP	44.8406	37.5266
HMGCL	12.7659	44.8293
SNHG1	44.8214	43.0039
TNFRSF19	44.7734	34.5234
ADD1	44.7203	40.566
GOT1	37.8011	44.7104
COPS5	44.6955	33.7528
WDR77	44.6872	9.21103
STAG2	34.4338	44.6734
SIGMAR1	44.6715	13.8003
ADAMTS1	44.6556	32.4175
CHCHD3	44.6435	31.4878
CSNK1A1	44.6261	36.5206
DNMT1	44.5795	22.8283
PPP4C	44.5384	27.4046
VASP	44.5268	26.4256
MPZL1	38.6871	44.5085
UFC1	44.5077	40.1939
TRIP12	44.4429	36.7344
ATF6B	38.6627	44.4272
TFDP1	44.3725	21.856
CAPZA2	44.338	39.5892
IPO5	44.3114	31.6357
FLII	44.2746	38.4383
MRPL15	44.2706	18.2894
GSTO1	44.2565	28.0641
DYRK2	33.9648	44.2351
NUP188	44.2168	20.9419
TGFB2	44.2143	33.3873
CDC123	44.2065	16.7508
ZFAND2A	10.7954	44.183
C7orf44	42.3988	44.1326
EMP3	36.9114	44.1153
CKAP4	44.1133	22.16
SF3A3	44.0787	23.5419
IL13RA1	38.9823	44.0778
GAS2L3	15.7153	44.0718
C19orf53	44.0677	28.4556
LAMTOR1	44.0482	23.8965
C14orf105	14.8696	43.9825
CDK6	43.3424	43.9799
NQO1	43.9744	16.9354
C9orf78	43.8989	27.5917
ATAD2	43.8861	34.1664
GGCT	43.8527	25.5016
ATP5G3	43.8294	26.4187
UBXN1	40.0214	43.8139
NECAP2	43.8085	41.5863
GRB2	43.8042	34.8753
2012-09-11	43.8018	28.1979
CDK2	43.7909	32.7092
SUPT5H	35.3587	43.7611
MYO1B	43.7576	31.788
LTBR	43.7283	28.7937
PPIA	43.7134	29.5737
IST1	38.4918	43.6505
TNPO3	36.8926	43.5681
RSRC2	37.6964	43.5424
GTF3C5	43.5408	30.1089
TECR	43.5278	29.4225
METTL11A	43.5005	19.3849
CCAR1	43.4912	29.7094
MCM6	43.4787	15.3041
C12orf23	43.4772	35.1252
SNX33	7.06741	43.4733
SUMO1	43.4576	26.133
CCNA2	43.4432	29.933
DNTTIP2	43.4368	18.9582
CDCA5	43.4187	22.2474
SUN1	35.7756	43.4034
BUB1	38.2488	43.3831
C3orf37	43.3771	27.8258
CHTOP	43.3736	19.2817
EI24	43.367	25.2761
DPP4	19.347	43.3609
TMED4	43.3438	37.3211
ICAM1	34.5927	43.2893
GIPC1	43.2227	17.1643
RANBP1	43.2089	10.4061
NCS1	43.1827	26.755
TMEM165	43.1337	24.7773
ADSL	43.0949	26.6179
PRPF6	43.0711	29.985
LIF	27.2031	43.0689
TMEM85	43.0585	23.8279
GABARAPL2	43.0027	31.7004
LOC644961	42.9991	27.4837
GALNT10	42.9891	38.931
GPR107	27.9476	42.9884
MRPS34	42.9407	15.0834
SLC38A1	42.9393	30.6242
MRPL9	42.9279	28.5791
PTPN11	42.7876	27.0631
SMC1A	42.7211	28.8915
ZFAND3	42.7208	39.4571
DNAJB1	42.7166	12.9903
PSMD10	42.684	30.8712
PSMD8	42.5952	21.5556
C20orf30	42.5483	33.1415
EPAS1	6.52115	42.5192
PJA2	24.8664	42.5191
INSIG1	40.804	42.5075
KLF10	30.3995	42.4554
NOTCH2	42.4528	36.3078
LY6E	42.4477	27.7459
AATF	42.4374	17.5307
DDX39A	42.4215	14.5492
LUC7L2	42.4198	26.2318
EPB41L3	42.4125	23.567
ASF1B	42.4035	16.776
MTA2	42.395	17.4099
CPSF7	42.3723	30.5632
DNM1	34.3401	42.3717
MSH2	42.3404	19.8428
FAT1	36.9958	42.334
CYB5A	42.3309	35.2872
FRMD6	42.3293	34.27
SERPINB1	18.7986	42.2981
ITPA	42.2745	15.613
MBTPS1	42.2583	34.1837
RIPK2	42.2285	34.8421
LAMC2	42.2281	35.5813
GPBP1L1	32.4261	42.179
LRRC61	42.1711	19.7081
LSM14A	34.6717	42.1557
TACC3	42.1494	19.8957
IMPAD1	27.5617	42.0669
DDIT3	10.8789	42.0652
USP5	42.0499	23.582
KRT80	42.0052	30.5295
BABAM1	41.9259	32.4278
BCKDHA	13.1394	41.9173
SNX10	20.9154	41.8859
MOXD1	21.9939	41.882
KIF5B	41.8583	31.4862
MYLK	21.1352	41.8524
IER3IP1	41.8134	28.1949
BAZ2A	29.7154	41.7856
SUMO3	41.7136	21.4628
TES	41.7122	37.7943
RAP1A	38.47	41.6881
PAM	17.0458	41.6853
POLR2C	41.666	29.7247
IGFBP7	26.4244	41.6655
TM9SF2	41.6056	33.9708
PRPF4	41.5711	14.4367
CDC25B	34.1293	41.5528
CCDC80	41.5505	36.4955
DDX24	41.506	27.4097
XBP1	41.4789	22.1196
RAB10	41.4764	30.2485
NSFL1C	41.4666	21.8554
HIP1R	41.4617	40.7514
RPA2	41.3809	20.0327
SKP1	41.3618	26.637
TAX1BP1	34.7656	41.3411
TMEM59	29.286	41.2937
DNAJC9	41.2664	11.1079
TXLNA	41.2654	21.2857
NDST1	41.2434	21.4267
CTGF	41.2269	13.4064
RRAD	41.2158	16.9816
PDAP1	41.1681	17.8691
PPIL1	41.0989	13.1643
UQCR11	41.0422	8.13911
HAX1	41.0054	35.9398
UROD	41.0009	21.6759
RPL17	35.6145	40.9817
TAGLN	40.9692	10.1488
NUP205	40.9446	28.5733
TM9SF3	39.6222	40.911
PDP1	25.3585	40.9103
CBX5	35.6243	40.8331
ACIN1	40.8275	27.2971
KIRREL	40.8072	30.4727
FAR1	40.8024	23.4908
ATP5G1	40.7154	18.11
SPAG9	23.293	40.7096
DCAF13	40.7084	17.1245
VARS	40.7026	14.6072
NOC2L	40.6098	9.5241
ARPC4	40.5911	21.7943
AARS	40.5436	22.7356
GINS2	40.5316	13.8259
PMEPA1	40.5044	19.6369
PPP1R15A	14.2738	40.4453
UBXN4	40.4436	37.6738
MRPS18B	40.4328	30.0673
COL6A2	40.3841	19.7688
EXOC4	18.827	40.3585
NDUFA4	40.3549	25.2151
MRPS16	40.3504	21.3073
SRPR	40.3424	23.4068
IMMT	40.3319	37.7877
PDCD10	40.3269	39.9835
CD68	16.5282	40.3071
UBE3C	40.2689	20.9784
NUP62	40.2565	15.0917
WDR5	40.2197	17.0986
RPS7	40.214	32.0082
MRPL50	40.2107	18.6474
TRAF2	40.1892	22.3817
NUP153	40.1775	21.0619
CHD3	28.7896	40.1623
FYTTD1	40.1446	28.4392
NME4	40.1411	27.4051
NDUFA6	40.1355	27.8291
LAS1L	40.0881	20.9904
EIF2S2	40.0568	16.9288
MRPL28	40.0522	16.954
RSL24D1	37.0929	40.0381
RPA1	40.0339	30.9605
HSF1	40.0185	21.9838
HEXA	28.7258	39.9963
CSNK1D	38.2115	39.9696
SNX6	31.952	39.968
YME1L1	39.9484	28.2261
TCF25	39.881	27.4977
ACSL4	39.876	31.6377
FAM32A	39.8257	15.7496
AKR1A1	28.947	39.8219
MXI1	6.77841	39.7999
UBE2A	39.7978	20.5186
RAB2A	39.7835	24.241
COX5A	39.7165	31.0519
PTGR1	21.2879	39.7098
TRA2A	39.6942	28.2875
CIRH1A	39.6716	19.9935
CUL4B	27.3127	39.6566
G6PD	39.6278	14.3338
USMG5	39.6167	33.8489
SMAD3	28.8422	39.6019
ANKRD13A	25.4094	39.5814
HDAC3	29.3244	39.5668
PRPS2	39.5551	31.4718
CDC42	39.5429	29.7258
TSTA3	39.5277	15.0584
FUBP3	39.5239	30.9456
2012-09-07	39.4989	36.6891
C9orf30	25.2406	39.4228
NOP2	39.4168	10.2299
IFI30	39.4103	15.5913
PACS1	28.4674	39.3715
PFKL	35.154	39.3467
MYH10	39.3382	34.4679
COL8A1	17.7075	39.3213
YIPF3	39.2701	32.1946
ARGLU1	36.8683	39.2645
NRSN2	39.2216	23.2399
ENAH	39.2068	26.8716
ERGIC2	39.1898	31.1504
FAM96A	39.1599	15.6739
C7orf50	39.1408	11.5021
AFF1	24.3459	39.117
H2AFV	39.0993	22.3357
SNF8	39.0968	32.4486
GSS	39.0963	31.9342
SMARCB1	39.0903	37.7927
FEN1	39.0634	8.85838
UBE2T	39.0454	25.4865
ABCF1	39.0339	17.4048
UXS1	34.9918	39.0201
FLOT2	33.3982	38.9937
GPAA1	38.9726	11.599
HADHB	28.435	38.9666
SMARCE1	37.8622	38.9102
RNF114	38.8981	34.0271
RFC4	38.8656	24.6307
ADIPOR1	36.3853	38.8325
DKK1	38.8051	7.95535
YTHDF1	38.7882	18.9238
TOR1A	38.7701	19.3744
DERL1	38.7577	24.3358
ANXA2P1	38.7264	35.4412
TOMM7	30.0683	38.7004
F2RL1	38.6488	14.4085
RPS2	38.5933	27.6289
RBCK1	24.8873	38.5857
RIOK3	14.3707	38.5851
GPRC5A	21.3245	38.5841
COBRA1	38.5787	24.8199
CAD	38.5663	17.2527
IRS2	12.3722	38.5653
C22orf28	38.555	26.281
LETMD1	15.8209	38.5276
COX17	38.5054	28.4151
KIF20A	38.4799	38.2485
VPS72	38.4707	24.3539
APOA1BP	38.4549	21.0727
TP53BP2	31.1986	38.4373
GOLM1	38.4046	20.7264
POLR2B	38.3949	19.216
LAMTOR2	38.3411	26.4513
SNRPG	38.3362	21.7557
CRKL	22.2434	38.3243
TAB2	31.6951	38.2731
MRPL49	38.2717	21.3039
SHC1	38.2712	23.8603
DDR1	24.08	38.2493
C7orf59	38.2439	34.1472
OSBPL9	38.2432	38.1345
ST6GALNAC6	22.5608	38.2408
IAH1	25.029	38.208
NDUFB6	38.1911	14.1834
NMT2	25.5105	38.1373
DCTN1	38.0964	26.2887
MTFR1	33.197	38.0961
C6orf72	28.0072	38.0638
C10orf10	1.17343	38.0582
AMD1	38.0216	11.0183
MKRN1	19.2694	38.02
USP1	38.0037	19.5077
NSDHL	37.9456	16.1244
CST3	37.9237	37.5942
METAP2	37.9149	28.933
PDRG1	37.9082	20.9635
PPP1R3B	6.72232	37.8456
PPP2CB	37.8434	25.9347
TRAP1	37.8429	27.5711
POLR2G	37.8421	23.5126
RRP36	37.8396	14.5742
TM4SF18	24.0285	37.8094
PNRC1	25.4626	37.7925
MYADM	37.7821	28.4148
MSH6	37.7798	29.1047
ZMYM6NB	29.7414	37.7697
XPOT	37.7666	19.1242
PLEC	37.7567	14.4831
KIAA1598	28.3853	37.7425
SNRPD1	37.7338	13.1815
MYO1C	37.7292	36.0218
WARS	37.6841	16.0693
LSM4	37.6755	23.7099
PRCP	27.4203	37.6752
HTATSF1	37.6712	18.5889
AIMP2	37.6296	8.09852
HLTF	30.5427	37.6169
ISOC2	37.6144	6.85463
TXNL1	37.5906	19.1999
LONP1	37.5306	30.6614
PUM1	30.1646	37.5104
RNF11	37.5018	37.1197
NMT1	37.4855	21.6175
TGIF1	34.2574	37.4652
UBA2	37.4623	37.3321
CHCHD8	37.4289	21.2896
SFXN3	10.2877	37.4254
IGF2BP2	36.1012	37.4132
TEX261	37.4121	23.656
TAF1D	32.0037	37.4065
ZNF146	37.3544	27.9875
NCEH1	37.2756	33.1293
MAP4K4	37.2683	31.6755
CTNNBL1	37.2617	27.9439
ACOT9	37.2584	21.1207
CNPY3	35.9019	37.2097
AES	34.7457	37.1991
WDR6	37.1936	24.7071
TIMM13	37.1923	6.1286
CALM1	37.1748	13.2773
YAP1	29.7881	37.1709
CAPN1	37.1607	28.9763
SEC23A	35.6672	37.1092
PIEZO1	37.0982	25.3374
PBX3	18.6037	37.0811
NDUFS4	24.6052	37.0782
DYNC1H1	31.6453	37.0612
UGP2	37.0389	33.3017
FAM176A	37.0277	18.0999
CUL1	37.0242	19.9964
LSM2	37.0177	21.4532
WDR43	37.0048	24.5725
SH3GL1	36.3904	36.9863
MRPS35	36.9838	27.6085
KIF23	36.9196	21.7196
ENSA	36.9114	26.0826
C12orf62	36.9009	26.5591
TRAPPC2L	36.8138	26.8036
FUT11	8.67277	36.8094
MAN1B1	34.9558	36.7606
NDUFA9	36.7477	30.1399
STAG3	17.2685	36.7477
PBXIP1	16.1353	36.7458
CLPTM1L	36.7073	12.809
UBXN7	18.1508	36.7056
SNRPE	36.6703	22.335
ITCH	26.9349	36.6498
ACAT1	36.6432	29.9945
MRTO4	36.6306	8.08004
UAP1	36.6215	24.6143
UBE2J1	36.5887	19.1191
NDUFB1	36.1258	36.5656
UBR5	24.7957	36.5348
RAB35	36.4932	14.6493
BAZ1B	36.4587	25.5841
LOC647979	24.2007	36.4495
SEC24C	35.1318	36.3964
RNASEH2A	36.387	16.3629
ANXA6	33.5654	36.3636
FXYD5	36.3523	32.7576
RDBP	36.3292	26.8368
HOXA5	24.6494	36.3272
AGPAT2	36.3244	15.4878
TMEM219	19.9336	36.3195
SCARB1	36.3193	17.873
NOL11	36.282	12.5257
PHLDB2	32.3451	36.2765
NSUN2	36.2585	12.4806
AK2	34.8356	36.2344
PRCC	36.2276	14.0559
GCN1L1	36.187	24.2684
C20orf27	36.1664	7.4773
MACF1	24.6982	36.1594
NUFIP2	23.2455	36.156
CDK16	36.1537	33.8951
DNAJB2	23.789	36.1447
BST2	36.1423	25.8739
RAI14	32.9212	36.1354
HTATIP2	36.1269	32.2963
SEC31A	31.2207	36.1237
CARHSP1	20.8682	36.0614
SLC25A24	35.9622	27.8326
TMBIM1	24.7628	35.9547
SELM	35.9261	3.89637
MRPS33	35.9037	34.4454
ASAP1	28.8495	35.8959
ANKRD52	35.8826	15.5003
NUP107	35.8638	25.096
VPS25	35.8427	32.3434
DPM2	35.8254	26.5996
TRIP10	31.0904	35.8137
EPHX1	35.7926	33.3808
GART	35.7865	16.5004
GSTK1	35.0362	35.7647
PACSIN2	35.755	29.6449
COL18A1	35.7496	18.1271
C19orf48	35.7454	13.0939
RRAGC	19.6	35.7454
PHGDH	35.7415	24.242
TBC1D20	20.614	35.7207
EFNA1	7.70571	35.7159
DDX41	20.9809	35.7084
SF3B3	35.689	24.8141
CHCHD1	35.6644	13.9754
FAM171A1	35.6543	24.7005
UBE2E1	35.6372	32.5834
PPP1R12A	35.6356	29.2213
BCLAF1	35.6275	17.9833
LPCAT1	22.0628	35.6181
TBRG4	35.6116	19.3283
PSMA5	35.6088	16.7976
SRSF10	35.5918	19.8406
ADH5	31.4954	35.5691
NT5DC2	35.5648	12.6579
PTGS1	0.640367	35.5451
PHLDB1	35.5334	20.1712
NRIP1	23.633	35.5222
GRPEL1	35.512	21.8228
COL6A1	35.4723	9.93809
SIK1	16.0028	35.4599
MRPL23	35.4218	15.8533
C12orf57	35.3662	15.0522
RALY	35.3347	22.2076
CTSL1	35.3136	22.7769
TNKS1BP1	35.2938	27.5418
C16orf58	18.5317	35.29
ATXN2L	29.7369	35.289
CD40	35.2827	23.7218
HMGN4	34.2263	35.277
TPD52	22.1036	35.2725
SLC6A6	7.41498	35.2682
RNF187	28.5167	35.2646
YTHDF3	35.2581	26.1952
UBA3	35.2458	28.2707
E2F4	35.245	16.5298
COPS3	35.2426	20.6373
OCIAD1	29.7642	35.241
THOC7	35.229	25.5655
EPHA2	35.209	24.492
GTF2F1	35.1957	23.4706
RNF10	25.902	35.1517
PLXND1	35.1467	30.5868
POP7	35.1376	3.57665
RABGGTB	35.1248	24.7891
C19orf43	35.1227	23.775
H2AFX	35.1056	4.10462
TCERG1	35.095	28.4739
PSENEN	35.0805	24.0994
DLGAP5	35.0786	27.8015
SNAPC1	19.0041	35.0692
BCAS2	35.0662	14.8559
EIF4EBP1	35.0639	31.6045
CDKN2A	35.0457	21.6869
EIF5	35.0451	14.6363
SEC14L6	4.91407	35.0262
AURKAIP1	35.0074	13.1339
SLC25A13	35.0046	16.3323
SRPK1	35.0043	25.5615
TAF7	34.9671	34.5243
STX16	21.4828	34.9626
F2R	34.9151	33.8021
WDFY1	19.3887	34.9047
SAFB	34.8739	12.5655
DDX50	19.0637	34.8685
GLTSCR2	34.8651	27.8825
PRMT5	34.8353	20.3084
ICMT	34.8352	12.9207
HSD17B12	34.8264	34.8104
NUF2	34.8198	24.0432
NUP37	34.819	21.2795
FAM98A	34.8119	13.0778
TRPC4AP	34.7987	32.0017
MRPS21	33.0164	34.783
TCOF1	34.7782	10.3525
STX4	34.7705	25.207
SIRPA	34.7406	17.6366
ATP6V1E1	34.7372	29.3831
SF3A1	34.701	25.4352
AIP	34.6817	34.2359
TMED10	34.6796	32.1683
C11orf58	34.6625	22.0903
MRPL21	34.6623	21.2928
ASXL1	32.5144	34.6596
CYB5R3	34.5782	18.7192
TPP1	19.0598	34.5743
PSMG1	34.5596	12.9573
GYS1	21.189	34.5062
SNRNP25	34.5006	11.1268
TMED3	34.4992	24.7089
CEP250	14.9301	34.4974
EIF2AK1	34.4851	33.0716
TMEM45A	8.09583	34.45
JUN	34.4146	21.6447
TMED5	34.4083	27.9842
KIAA0368	34.4057	33.3316
LARS	34.401	23.208
INSIG2	5.60759	34.3851
CLDND1	34.3845	29.1396
CDK9	34.357	14.8592
STC2	14.1075	34.3558
SLC43A3	18.2669	34.3352
GTF3C4	34.3338	22.7973
DAXX	34.327	23.4478
CYB5B	34.305	21.7321
CMTM6	34.2998	19.7303
GADD45GIP1	34.2897	13.8045
NFKBIA	34.2679	29.4545
NUDT5	34.2583	18.848
ATOX1	34.2499	15.469
ATP2C1	32.7138	34.2387
FH	34.2077	22.1293
RPS27A	34.2054	27.1032
GPS1	34.1648	15.4079
TOP2B	34.1434	31.6199
PSMF1	34.1299	24.6857
2012-03-07	34.0987	30.3979
NUP93	34.0636	21.4602
ODF2	32.6269	34.0502
PDHB	34.0319	21.3615
SNX5	34.0123	29.5241
ATL3	33.9983	30.1626
PTGFRN	29.4185	33.9671
DR1	31.9525	33.9606
FNBP1	16.4405	33.9488
RNF167	29.7654	33.9288
HK2	5.71239	33.8643
RPS6KA3	30.4566	33.8606
GADD45B	33.8487	16.8537
TCEB2	33.8348	22.0804
NDUFS2	33.8156	33.5457
LIMK1	33.8153	22.6257
MTCH2	33.7994	22.3073
HLA-E	29.7067	33.7981
COBLL1	21.9409	33.7783
CCNL2	33.7567	28.9627
MRC2	32.7313	33.7347
HOXA10	33.692	33.4502
SMYD2	24.7636	33.6881
MXRA8	33.685	28.9359
UBL4A	33.6834	20.5524
GNA12	33.6825	22.8767
CXorf26	33.6815	10.702
DBNL	33.6813	14.1475
BAG2	33.6666	9.1377
SH3D21	5.99567	33.6431
GOLIM4	33.5968	19.6854
[truncated: 9,646 more rows]

## Sheet: Supplementary table 4
Supplementary table 4
Results of motif analysis
ranking	Extracted motifs and the most similar DNA-binding motif	E-value
1	DME1 Sp1_M00931	1.9096e-13
2	DME2 Sp1_M00933	3.9946e-13
3	DME13 TFII-I_M00706	5.5855e-12
4	DME199 HEB_M00698	1.3095e-11
5	DME81 UF1H3BETA_M01068	2.6593e-11
6	DME20 AP-1_M00925	3.477e-11
7	DME27 AP-1_M00925	3.477e-11
8	DME23 KROX_M00982	4.7061e-11
9	DME120 KROX_M00982	7.47e-11
10	DME92 Alfin1_M00479	7.6746e-11
11	DME173 Dde_M00304	1.0227e-10
12	DME44 Alx-4_M00619	1.3781e-10
13	DME7 MAZ_M00649	1.5536e-10
14	DME65 PU.1_M00658	1.7409e-10
15	DME3 GC_M00255	1.8965e-10
16	DME4 MAZ_M00649	2.5363e-10
17	DME5 UF1H3BETA_M01068	4.8328e-10
18	DME66 HIF1_M00466	6.0049e-10
19	DME116 PU.1_M00658	7.7733e-10
20	DME111 MAZ_M00649	9.12e-10
21	DME110 MAZ_M00649	1.3783e-09
22	DME18 SMAD3_M00701	1.437e-09
23	DME139 SMAD3_M00701	1.6685e-09
24	DME99 BLIMP1_M01066	1.6994e-09
25	DME8 CAC-binding_M00720	1.7523e-09
26	DME147 STE11_M01005	1.9828e-09
27	DME41 Sp1_M00931	3.0958e-09
28	DME57 AP-1_M00925	3.9014e-09
29	DME180 Barbie_M00238	3.9024e-09
30	DME64 ERF2_M01057	4.9441e-09
31	DME96 ERF2_M01057	4.9441e-09
32	DME153 Sp1_M00933	5.3095e-09
33	DME188 NGFI-C_M00244	5.6238e-09
34	DME115 TFII-I_M00706	6.7053e-09
35	DME133 Tel-2_M00678	6.9593e-09
36	DME127 Tra-1_M01048	7.6126e-09
37	DME25 UF1H3BETA_M01068	7.697e-09
38	DME144 MAZ_M00649	7.7654e-09
39	DME186 TFII-I_M00706	8.4686e-09
40	DME88 STE12_M00664	1.2695e-08
41	DME198 AP-2_M00915	1.3554e-08
42	DME152 MTF-1_M00650	1.4497e-08
43	DME46 ZNF219_M01122	1.5035e-08
44	DME97 CAC-binding_M00720	1.9476e-08
45	DME178 ROM_M00700	1.9506e-08
46	DME53 CAC-binding_M00720	2.483e-08
47	DME165 BLIMP1_M01066	2.6819e-08
48	DME157 ERF2_M01057	2.8e-08
49	DME39 STE12_M00664	2.945e-08
50	DME82 Sp1_M00931	3.6359e-08
51	DME128 PPARalpha-RXRalpha_M00242	3.8442e-08
52	DME51 Helios_M01004	3.9854e-08
53	DME60 Tel-2_M00678	4.1657e-08
54	DME11 STAT_M00777	4.3244e-08
55	DME15 HSF_M00163	4.4018e-08
56	DME70 Sp1_M00933	4.4037e-08
57	DME68 Tel-2_M00678	4.5702e-08
58	DME106 HAHB-4_M00820	4.6639e-08
59	DME63 Sp1_M00931	5.972e-08
60	DME108 MYB80_M01052	6.3408e-08
61	DME17 TFII-I_M00706	6.3718e-08
62	DME40 Sp3_M00665	6.412e-08
63	DME121 Sp1_M00931	6.7237e-08
64	DME130 Barbie_M00238	6.7473e-08
65	DME95 Sp1_M00931	6.9111e-08
66	DME84 Nkx2-5_M01043	9.3137e-08
67	DME54 CAC-binding_M00720	9.8662e-08
68	DME71 TFII-I_M00706	1.1965e-07
69	DME125 Sp1_M00933	1.4686e-07
70	DME102 MADS-A_M00408	1.493e-07
71	DME31 Osf2_M00731	1.6093e-07
72	DME140 Sp1_M00933	1.6639e-07
73	DME124 CAC-binding_M00720	1.7408e-07
74	DME16 Alx-4_M00619	1.7447e-07
75	DME177 Alfin1_M00479	1.7742e-07
76	DME38 Osf2_M00731	2.0869e-07
77	DME83 CAC-binding_M00720	2.1124e-07
78	DME24 Alfin1_M00479	2.1243e-07
79	DME21 MAZ_M00649	2.1421e-07
80	DME14 MAZ_M00649	2.1421e-07
81	DME55 MAZ_M00649	2.1421e-07
82	DME141 MAZ_M00649	2.1421e-07
83	DME91 Hb_M00022	2.2962e-07
84	DME172 PXR_M01153	2.3684e-07
85	DME117 BLIMP1_M01066	2.4478e-07
86	DME187 HSF_M00163	2.6856e-07
87	DME184 PCF2_M00948	2.7816e-07
88	DME107 Sp1_M00933	2.8008e-07
89	DME118 BR-C_M00094	2.9379e-07
90	DME145 ERF2_M01057	3.4124e-07
91	DME162 UF1H3BETA_M01068	3.6814e-07
92	DME36 LUN-1_M00480	3.9968e-07
93	DME158 UF1H3BETA_M01068	4.0207e-07
94	DME6 Elf-1_M00746	4.0943e-07
95	DME73 AP-2_M00915	4.1427e-07
96	DME138 Pax_M00808	4.1683e-07
97	DME191 Olf-1_M00261	4.2421e-07
98	DME87 Alx-4_M00619	4.3323e-07
99	DME74 Nrf-2_M00108	5.3963e-07
100	DME43 Oct-4_M01124	5.991e-07
101	DME9 BLIMP1_M01066	6.2002e-07
102	DME195 MAZ_M00649	6.6442e-07
103	DME182 LMAF_M01139	6.7531e-07
104	DME154 GC_M00255	6.8069e-07
105	DME169 GC_M00255	6.8069e-07
106	DME142 PacC_M00247	7.2973e-07
107	DME126 NERF1a_M00531	7.6856e-07
108	DME10 MAZ_M00649	7.8614e-07
109	DME122 UF1H3BETA_M01068	8.0635e-07
110	DME32 Sp1_M00931	8.4117e-07
111	DME113 CAC-binding_M00720	8.9284e-07
112	DME197 MAZ_M00649	9.1952e-07
113	DME35 GR_M00955	9.2903e-07
114	DME193 AbaA_M00027	9.7638e-07
115	DME137 MADS-A_M00408	1.0671e-06
116	DME160 UF1H3BETA_M01068	1.1431e-06
117	DME52 PEND_M01015	1.1497e-06
118	DME134 Nkx2-5_M01043	1.1868e-06
119	DME200 Ets_M00971	1.2131e-06
120	DME112 Alfin1_M00479	1.322e-06
121	DME30 STE11_M01005	1.4431e-06
122	DME79 Bach1_M00495	1.5163e-06
123	DME149 MAZ_M00649	1.5818e-06
124	DME132 Muscle_M00321	1.6968e-06
125	DME168 TATA_M00216	1.8087e-06
126	DME151 Sry-beta_M00666	1.8732e-06
127	DME28 LMAF_M01139	2.1169e-06
128	DME176 STE11_M01005	2.3555e-06
129	DME123 MAZ_M00649	2.3694e-06
130	DME185 MYB80_M01052	2.3821e-06
131	DME75 Lyf-1_M00141	2.4832e-06
132	DME90 MCM1+SFF_M01051	2.6184e-06
133	DME190 AP-2_M00915	2.7402e-06
134	DME61 POU1F1_M00744	2.8025e-06
135	DME143 MAZ_M00649	3.2443e-06
136	DME67 AP-2_M00915	3.264e-06
137	DME163 HEB_M00698	3.4544e-06
138	DME166 E2_M00928	3.7974e-06
139	DME174 Oct-1_M00161	4.1156e-06
140	DME136 SMAD3_M00701	4.2168e-06
141	DME109 HSF1_M01023	4.7774e-06
142	DME161 CAC-binding_M00720	4.8927e-06
143	DME146 AP-2_M00915	5.0062e-06
144	DME45 C-EBPgamma_M00622	5.4101e-06
145	DME196 PU.1_M00658	5.548e-06
146	DME159 SREBP-1_M00221	6.5397e-06
147	DME148 STE11_M01005	7.198e-06
148	DME135 ZAP1_M00754	7.627e-06
149	DME69 MYB80_M01052	8.5922e-06
150	DME155 ZID_M00085	8.7817e-06
151	DME170 p53_M00034	9.7183e-06
152	DME33 KROX_M00982	1.0402e-05
153	DME93 AFP1_M00616	1.2032e-05
154	DME47 NF-AT_M00935	1.2669e-05
155	DME62 HSF_M00164	1.3062e-05
156	DME181 CAC-binding_M00720	1.3236e-05
157	DME179 E2A_M00973	1.3245e-05
158	DME192 HNF3beta_M00131	1.4375e-05
159	DME50 MYBAS1_M00798	1.4617e-05
160	DME12 PU.1_M00658	1.6298e-05
161	DME101 LMAF_M01139	1.7157e-05
162	DME164 Adf-1_M00923	1.7658e-05
163	DME80 BR-C_M00092	2.1529e-05
164	DME104 RBP-Jkappa_M01112	2.2407e-05
165	DME34 MYBAS1_M00798	2.3005e-05
166	DME171 Nkx2-2_M00485	2.5429e-05
167	DME77 CRP_M00202	2.5535e-05
168	DME29 STE12_M00664	2.5993e-05
169	DME175 Olf-1_M00261	2.8061e-05
170	DME19 STAT_M00777	3.5091e-05
171	DME131 Lyf-1_M00141	3.5589e-05
172	DME37 dl_M00043	3.862e-05
173	DME94 STE12_M00664	4.1468e-05
174	DME76 PXR_M01153	4.2734e-05
175	DME89 Dof_M01136	4.2958e-05
176	DME150 MAZ_M00649	5.0574e-05
177	DME42 TGIF_M00418	5.155e-05
178	DME194 HAHB-4_M00820	5.2936e-05
179	DME58 HAC1_M00730	5.3832e-05
180	DME189 PCF2_M00948	6.0636e-05
181	DME100 HSF_M00170	6.1685e-05
182	DME59 TEF-1_M00704	7.113e-05
183	DME22 PXR_M01153	8.7535e-05
184	DME156 UAY_M00391	0.00010689
185	DME48 HP1_M00725	0.00011076
186	DME129 KAISO_M01119	0.00011592
187	DME167 AP-2alphaA_M01047	0.00013353
188	DME49 Cdx_M00991	0.00017121
189	DME85 TGIF_M00418	0.00021937
190	DME105 TEF-1_M00704	0.00022794
191	DME98 AP-2_M00915	0.00022842
192	DME56 KAISO_M01119	0.00025099
193	DME114 YY1_M00069	0.00026785
194	DME183 GBF_M00633	0.00027779
195	DME103 STE11_M01005	0.00029529
196	DME78 PEND_M01015	0.00030256
197	DME26 DEAF1_M01001	0.00033525
198	DME119 HSF1_M01023	0.00040268
199	DME86 LUN-1_M00480	0.0006011
200	DME72 Sp1_M00933	0.00078934

## Sheet: Supplementary table 5
Supplementary table 5
Summary of ontology analysis of the 249 upregulated genes The 249 genes in fig. 3b were analyzed by DAVID. Terms are output names of biological processes. Genes related to the biological processes are shown in the column of "genes".
Term	p-value	Genes
regulation of smooth muscle	1.3e-05	PDGFB, JUN, VEGFA, EDN1, ITGA2, IGFBP3, KLF4
cell proliferation
epidermis development	5.1e-05	LAMB3, EVPL, CST6, COL7A1, TRPV1, AHNAK2, LAMC2, SFN, COL1A1, SOX9, KLF4
regulation of cell proliferation	0.00066	PDGFB, IL8, E2F7, EDN1, ITGA2, SFN, SOX9, LIF, WARS, DHRS2, CDKN1A, IL20RB, JUN, KIFAP3, VEGFA, SERPINE1, RTKN2, IGFBP3, KLF4, KCTD11, FABP6
regulation of apoptosis	0.0049	IER3, CEBPG, BIRC7, ASNS, NR3C1, SFN, SOX9, NLRP1, AMIGO2, DHRS2, CDKN1A, DUSP1, BBC3, JUN, VEGFA, TNFAIP8, ABL1, IGFBP3, ANGPTL4
regulation of chemotaxis	0.0052	IL8, PDGFB, VEGFA, ITGA2
response to oxygen levels	0.0057	CDKN1A, PDGFB, PLOD2, VEGFA, EDN1, ITGA2, ANGPTL4
regulation of locomotion	0.0067	IL8, PDGFB, CLIC4, VEGFA, EDN1, RRAS, ITGA2, IGFBP3

## Sheet: Supplementary table 6
Supplementary table 6
Summary of ontology analysis of the 25 genes The 25 genes in fig. 3d were analyzed by DAVID as in supplementary table 5.
Term	p-value	Genes
negative regulation of phosphorylation	0.0018	CDKN1A, JUN, IGFBP3
regulation of smooth muscle cell proliferation	0.0019	JUN, VEGFA, IGFBP3
response to inorganic substance	0.0028	CDKN1A, JUN, SERPINE1, COL1A1
regulation of apoptosis	0.0042	IER3, CDKN1A, JUN, VEGFA, ABL1, IGFBP3
response to reactive oxygen species	0.0049	JUN, SERPINE1, COL1A1
ossification	0.0111	NAB2, COL1A1, IGFBP3
